# Supplementary material for: 4-Mercaptobenzoic Acid Labeled Gold-Silver-Alloy-Embedded Silica Nanoparticles as an Internal Standard Containing Nanostructures for Sensitive Quantitative Thiram Detection
Source: PubMed Central journal article supplement (PMC6801479; doi:10.3390/ijms20194841), 2019-09-29
Supplement: ijms-20-04841-s001.pdf [file ijms-20-04841-s001.pdf]

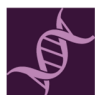

# 4-Mercaptobenzoic Acid Labeled Gold-Silver-alloy-embedded Silica Nanoparticles as an Internal Standard Containing Nanostructures for Sensitive Quantitative Thiram Detection

Xuan-Hung Pham <sup>1</sup>, Eunil Hahm <sup>1</sup>, Kim-Hung Huynh <sup>1</sup>, Byung Sung Son <sup>1</sup>, Hyung-Mo Kim <sup>1</sup>, Dae Hong Jeong <sup>2</sup> and Bong-Hyun Jun <sup>1,\*</sup>

<sup>1</sup> Department of Bioscience and Biotechnology, Konkuk University, Seoul 143-701, Republic of Korea; phamricky@gmail.com (X.-H.P.); greenice@konkuk.ac.kr (E.H.); huynhkimhung82@gmail.com (K.-H.H.); imsonbs@konkuk.ac.kr (B.S.S.); hmkim0109@konkuk.ac.kr (H.-M.K.)

<sup>2</sup> Department of Chemistry Education, Seoul National University, Seoul 151-742, Republic of Korea; jeongdh@snu.ac.kr

\* Correspondence: bjun@konkuk.ac.kr; Tel.: +82-2-450-0521

Supplementary materials:

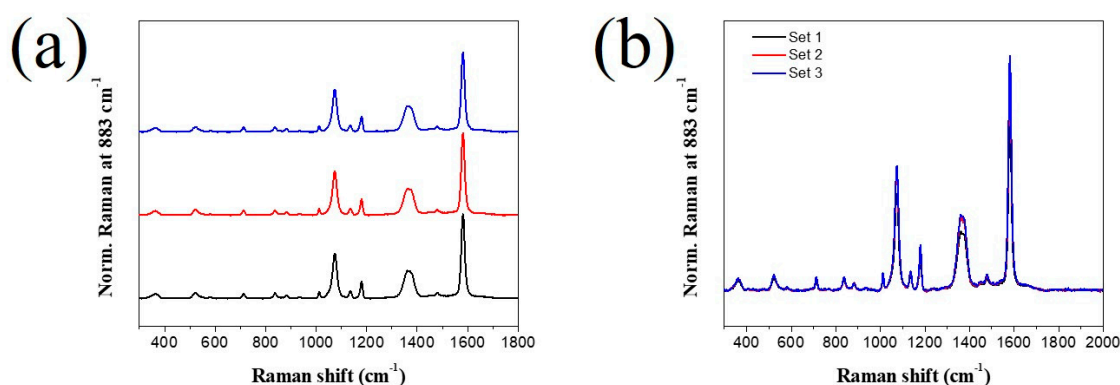

Figure S1. (a) Reproducibility and (b) repeatability of SERS signal of SiO<sub>2</sub>@Au@4-MBA@Ag NPs.

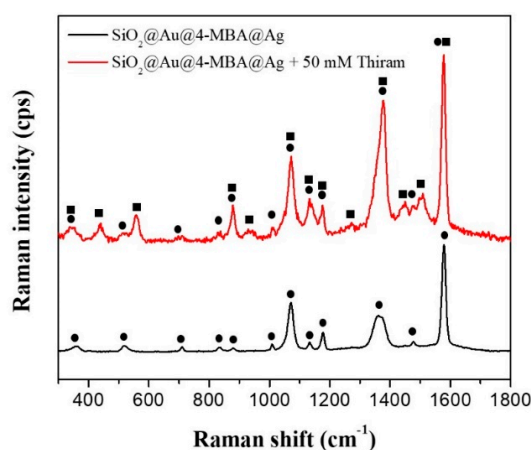

Figure S2. SERS spectra of SiO<sub>2</sub>@Au@4-MBA@Ag nanoparticles in the presence and absence of 50- $\mu$ M thiram.

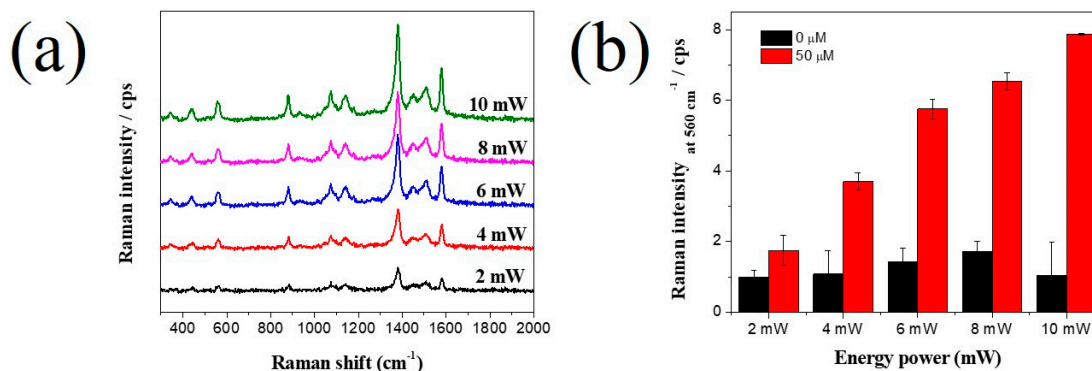

**Figure S3.** Effect of employed power energy on SERS signals of thiram detection: (a) SERS spectra and (b) SERS signal plot of SiO<sub>2</sub>@Au@4-MBA@Ag nanoparticles in the presence of 50-μM thiram at employed power energy in the range of 2–10 mW.

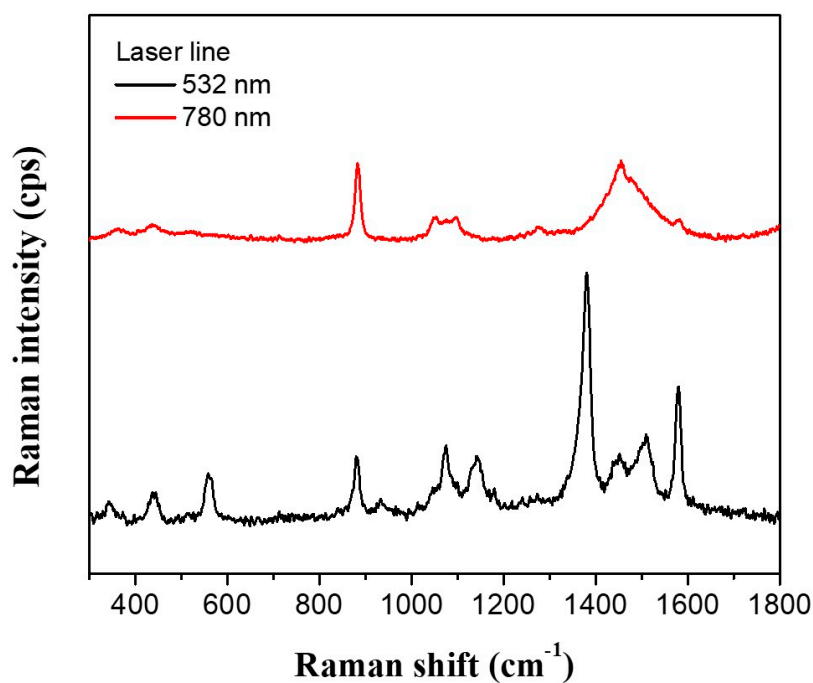

**Figure S4.** Effect of laser lines on SERS signals of thiram detection by SiO<sub>2</sub>@Au@4-MBA@Ag nanoparticles in the presence of 50 μM thiram at 10 mW.
